# Supplementary material for: Structural insights into p300 regulation and acetylation-dependent genome organisation
Source: Springer Nature journal article supplement (doi:10.1038/s41467-022-35375-2), 2022-12-15
Supplement: MOESM1 [file 41467_2022_35375_MOESM1_ESM.pdf]

# Supplementary Information for

## **Structural insights into p300 regulation and acetylation-dependent genome organisation**

Ziad Ibrahim<sup>1</sup>, Tao Wang<sup>2</sup>, Olivier Destaing<sup>2</sup>, Nicola Salvi<sup>3</sup>, Naghmeh Hoghoughi<sup>2</sup>, Clovis Chabert<sup>2</sup>, Alexandra Rusu<sup>1</sup>, Jinjun Gao<sup>4</sup>, Leonardo Feletto<sup>1</sup>, Nicolas Reynoird<sup>2</sup>, Thomas Schalch<sup>1</sup>, Yingming Zhao<sup>4</sup>, Martin Blackledge<sup>3</sup>, Saadi Khochbin<sup>2</sup> & Daniel Panne<sup>1,\*</sup>

<sup>1</sup>Leicester Institute of Structural and Chemical Biology, Department of Molecular and Cell Biology, University of Leicester, Leicester, UK

<sup>2</sup>CNRS UMR 5309, INSERM U1209, Université Grenoble Alpes, Institute for Advanced Biosciences, Grenoble, France.

<sup>3</sup>Institut de Biologie Structurale, CNRS, CEA, UGA, Grenoble, France

<sup>4</sup>Ben May Department of Cancer Research, The University of Chicago, Chicago, IL 60637, USA.

\*Correspondence: [daniel.panne@leicester.ac.uk](mailto:daniel.panne@leicester.ac.uk)

### **This PDF file includes:**

Supplementary Figures 1 to 7  
Supplementary Tables 1 to 9

Legends for Supplementary Movies 1 and 2



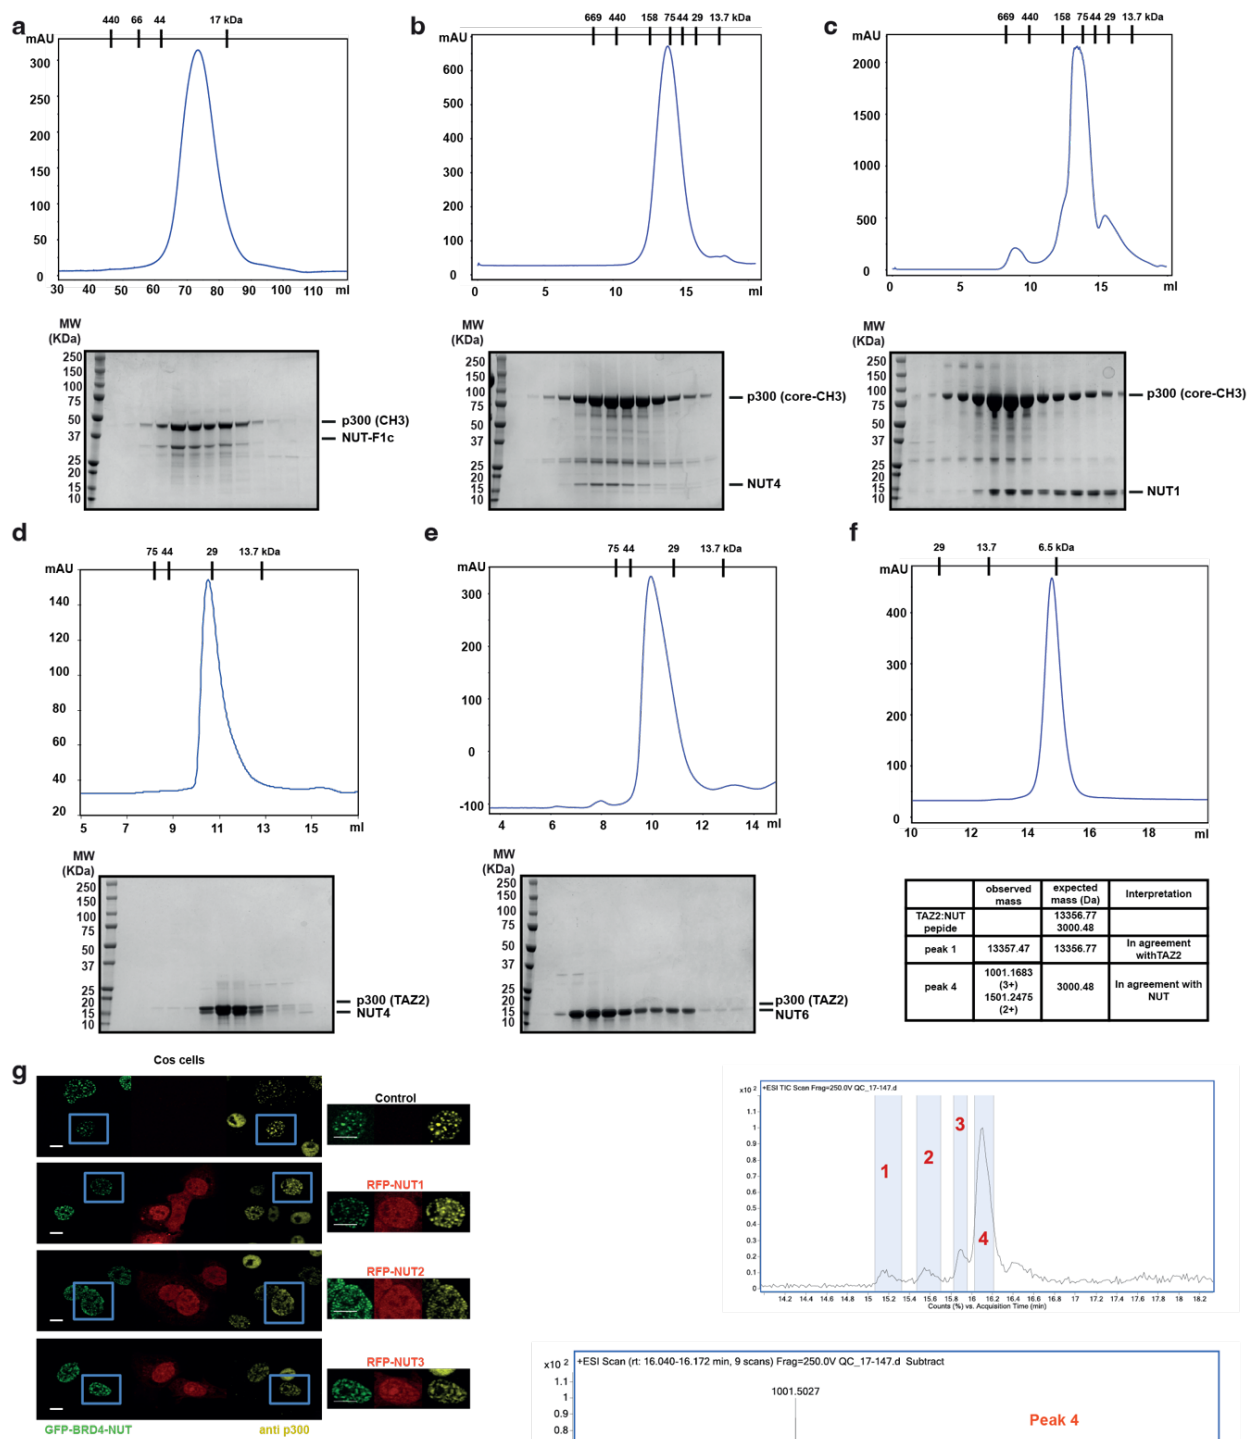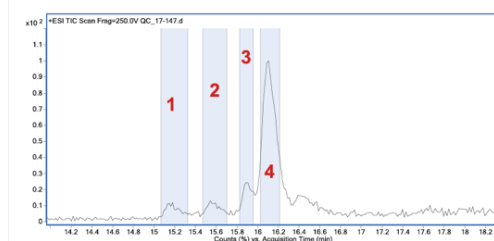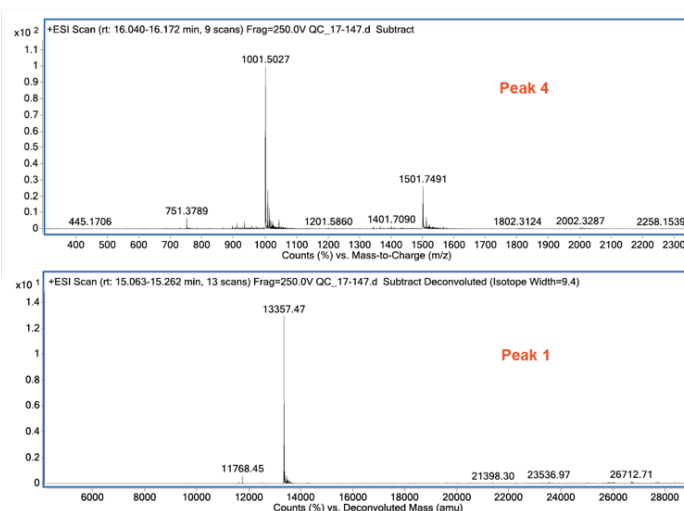

**Supplementary Fig. 2. Identification of an acidic activation domain in NUT.**

**a**, Size-exclusion chromatography (SEC) analysis of p300 CH3-NUT-F1c complex on HiLoad Superdex 200 column. **b**, SEC analysis of p300 core-CH3-NUT4 complex on Superdex 200 Increase 10/300. **c**, p300 core-CH3-NUT1 complex on Superdex 200 increase 10/300 GL. **d**, p300 TAZ2-NUT4 complex on Superdex 75 increase 10/300 GL. **e**, p300 TAZ2-NUT6 complex on Superdex 75 increase 10/300 GL. Bottom of each panel: SDS-PAGE analysis of the peak fractions. Experiments in a-e were repeated independently three times with consistency. **f**, SEC analysis of the TAZ2-NUT10 complex on Superdex 75 increase 10/300 GL column (top). Bottom: Reverse-Phase HPLC analysis of TAZ2-NUT10 peptide complex fractions followed by electrospray ionisation time of flight mass spectrometry (LC-ESI-TOF-MS). Table: Summary of the mass spectrometry analysis data showing the presence of TAZ2 (peak 1) and the NUT peptide (peak 4). **g**, Competition analysis: Cos7 cells were transfected with constructs expressing GFP-BRD4-NUT (green) alone or co-transfected with RFP-NUT1, 2 or 3 (red). Immunofluorescence with anti-p300 antibody was used to visualize condensation of endogenous p300. Experiments were repeated independently two times with consistency. Scale bars, 10  $\mu$ m.

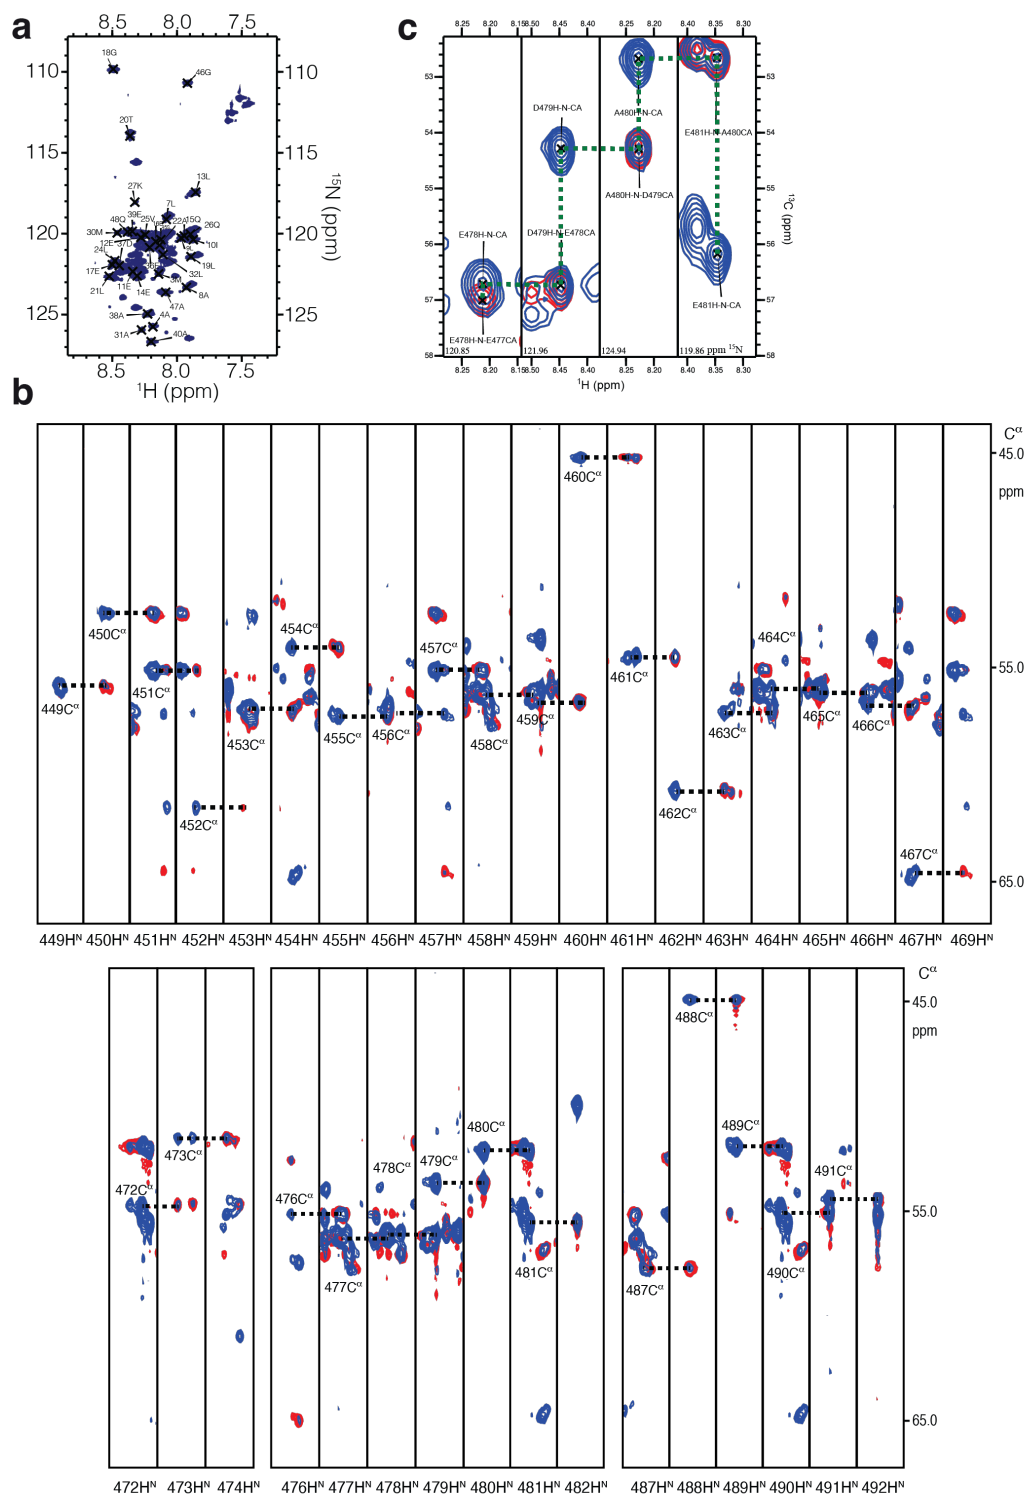

**Supplementary Fig. 3. Analysis of the TAZ2-NUT interaction.** **a**, Annotated  $^1\text{H}$ ,  $^{15}\text{N}$  HSQC spectra of NUT. **b**, Backbone assignment experiments showing magnetization transfer in HNCA (blue) and HN(CO)CA (red) experiments for the regions of NUT7(448-492) that could be assigned (experimental parameters described in Methods section). Dashed lines demonstrate correlations between neighbouring amino acids. **c**, Zoom of the same for NUT amino acids 478-481.

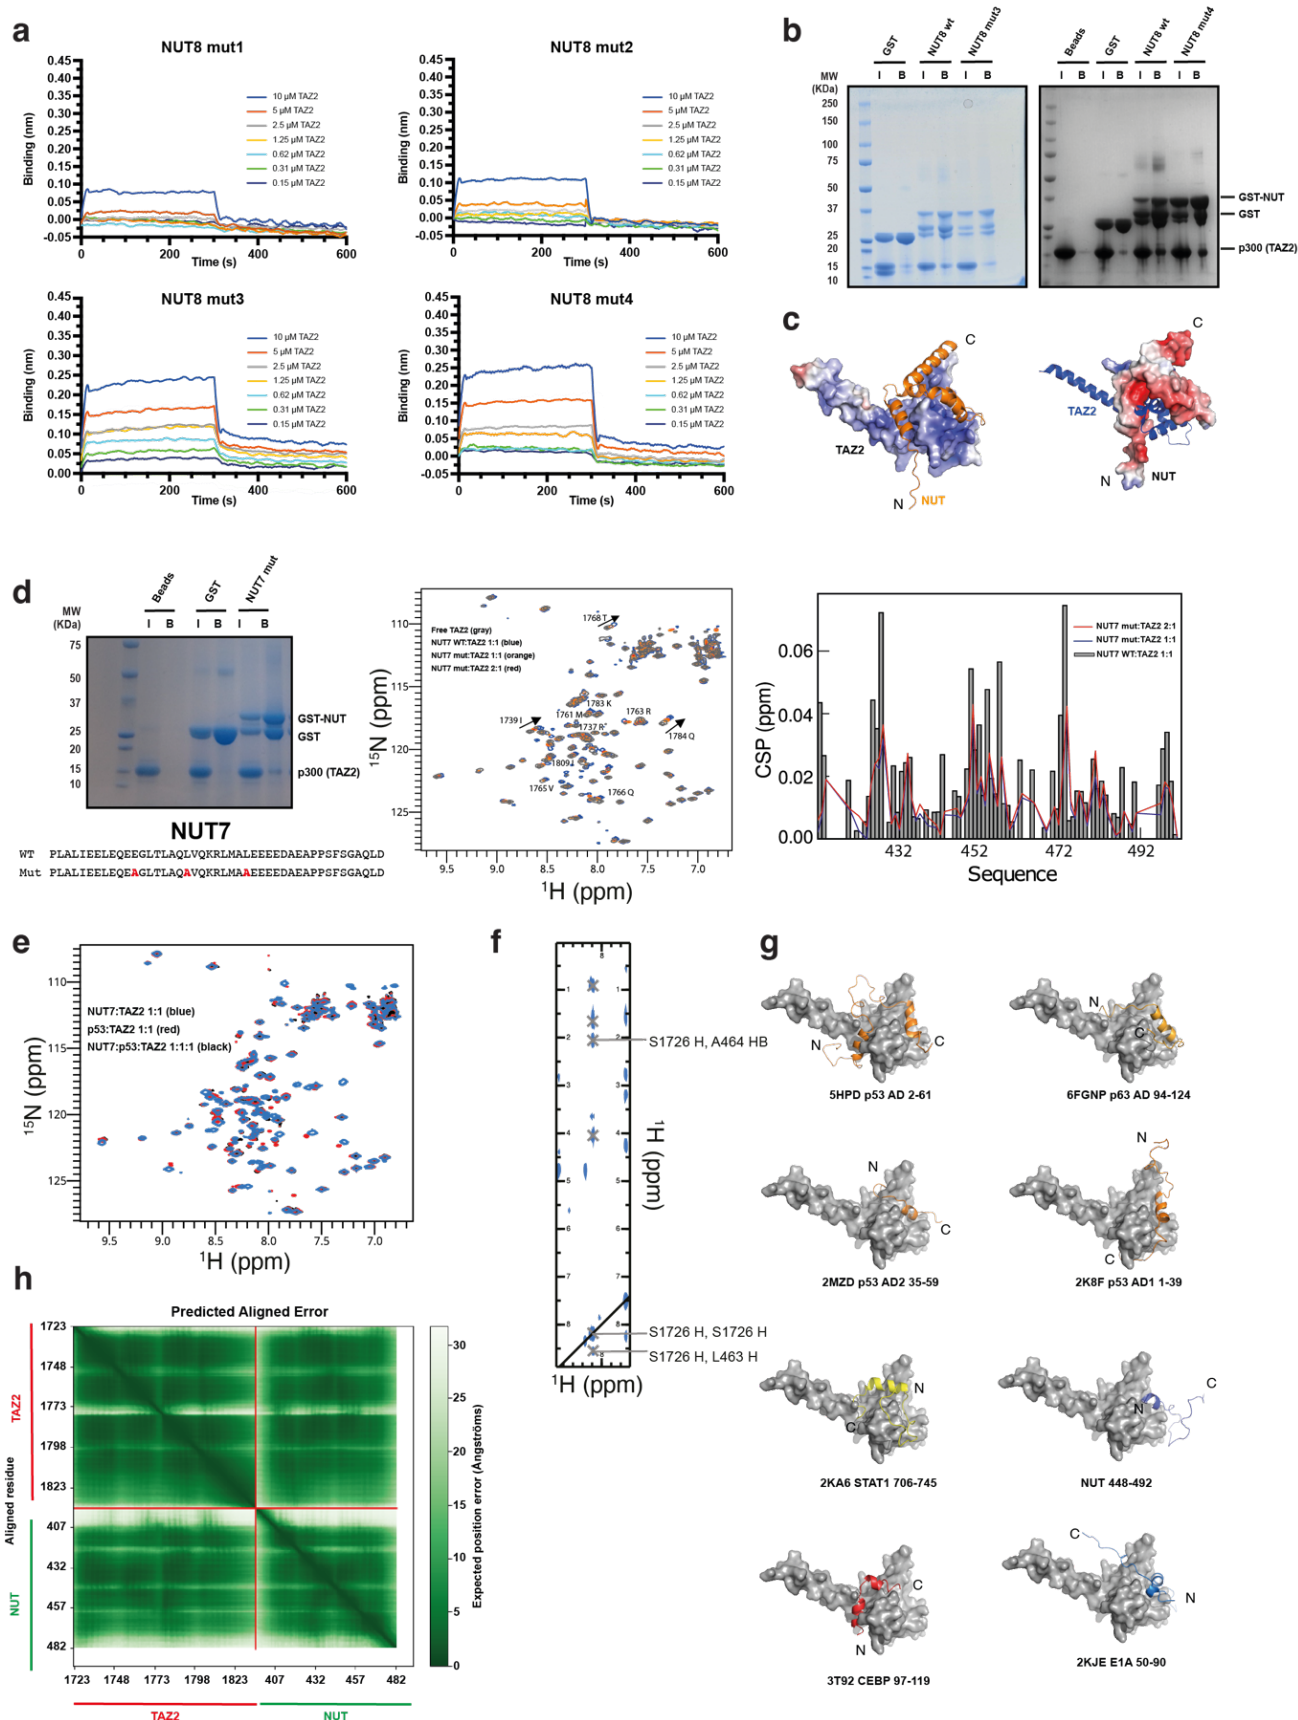

**Supplementary Fig. 4. Analysis of the TAZ2-NUT interaction.**

**a**, Representative Biolayer Interferometry (BLI) profiles of p300 TAZ2 interaction with NUT8 (396-470) mutants 1, 2, 3 and 4 from which the steady-state data shown in Fig. 3b were derived. The GST-



[illegible]

7

domain. **d**, NCP binding of p300 core. **e**, NCP binding of p300 core-CH3. Native PAGE gels were stained with SybrSafe DNA stain or Coomassie Blue. Experiments a-d were repeated independently at least three times. Representative data are shown. **f**, CryoEM density for the NCP used in biochemical studies. An atomic model of the NCP (PDBs: [3LZ0](#)) is docked into the density. **g**, SDS-PAGE gel showing input material used for quantitative mass spectrometry experiments. **h**, Quantitative mass spectrometry of NCP acetylation. Reconstituted NCPs were incubated with Acetyl-CoA and p300s or the p300 core. Quantification of the site-specific histone H2B, H3 and H4 acetylation by label-free HPLC/MS/MS. Data are presented as mean values  $\pm$  SD derived from n=2 independent technical replicate experiments. Source data are provided in Supplementary Data 2. **i**, Cross-link (XL-MS) analysis of the p300 core-CH3:NCP complex. p300 residues that cross-link to the NCP histones are shown in red on p300 core ([4BHW](#)) and TAZ2 ([3IO2](#)) structures. Source data are provided in Supplementary Data 1. **j**, Graphical representation of the p300:histone and histones intermolecular cross-links and intra- p300 core-CH3 cross-links. The experiment was performed once. **k**, p300 (top) and CBP (bottom) gain-of-function mutations in the TAZ2 domain.

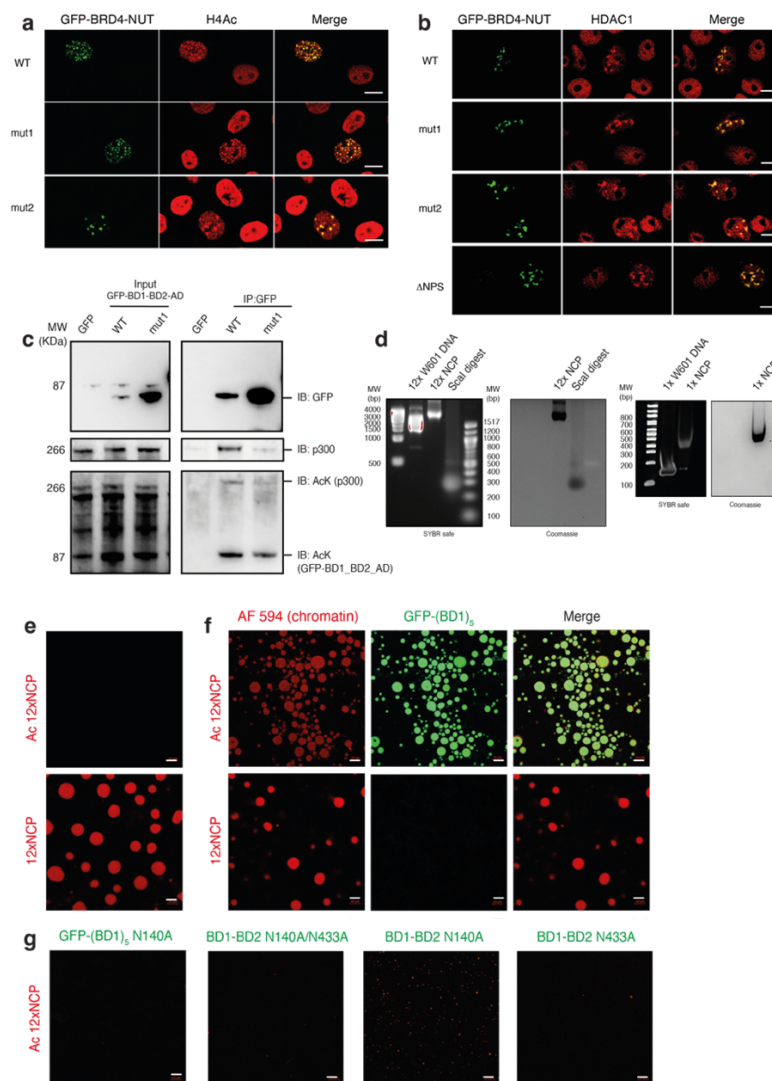

**Supplementary Fig. 6. Mechanism of condensation of BRD4-NUT and p300.**

**a**, Colocalization of BRD4-NUT condensates with acetylated H4 (H4Ac) or **(b)** with HDAC1. Cos7 cells were transfected with the indicated GFP-BRD4-NUT constructs and analysed by immunofluorescence using anti-H4Ac antibody and anti-HDAC1 antibody. Scale bars, 10  $\mu$ m. **c**, Cos7 cells were co-transfected with HA-p300 and the indicated GFP-BRD4-NUT variants or GFP alone as the control. Co-immunoprecipitation (IP) experiments were performed using anti-GFP antibody and immuno-blotted (IB) for GFP, p300 and Acetylated-Lysine. (Left panel) Input samples were loaded as



a control. Experiments in a-c were independently repeated at least three times with consistency. **d**, EMSA analysis of 12x nucleosome templates assembly (left) on 1% agarose (12xNCP) native gels. The 12x nucleosome template was digested with *ScaI* restriction enzyme to isolate single NCPs. (Right) EMSA analysis of mononucleosome (1x NCP) assembly on 5% native PAGE stained with Sybr safe or Coomassie Blue. The experiment was repeated two times with consistency. **e**, Fluorescence microscopy images of AF594-labeled dodecameric nucleosome arrays. Non-acetylated 12x NCP chromatin formed droplets (red, bottom panel) that are dissolved after p300 acetylation (top panel). Scale bars, 10  $\mu\text{m}$ . **f**, Acetylated and non-acetylated chromatin templates (red) in presence of GFP-labelled BRD4 (BD1)<sub>5</sub> (green). Scale bars, 10  $\mu\text{m}$ . **g**, Acetylated 12x NCP chromatin with GFP-labelled BRD4 mutants. Scale bars, 10  $\mu\text{m}$ . Experiment in e-g were repeated at least three times with consistency.

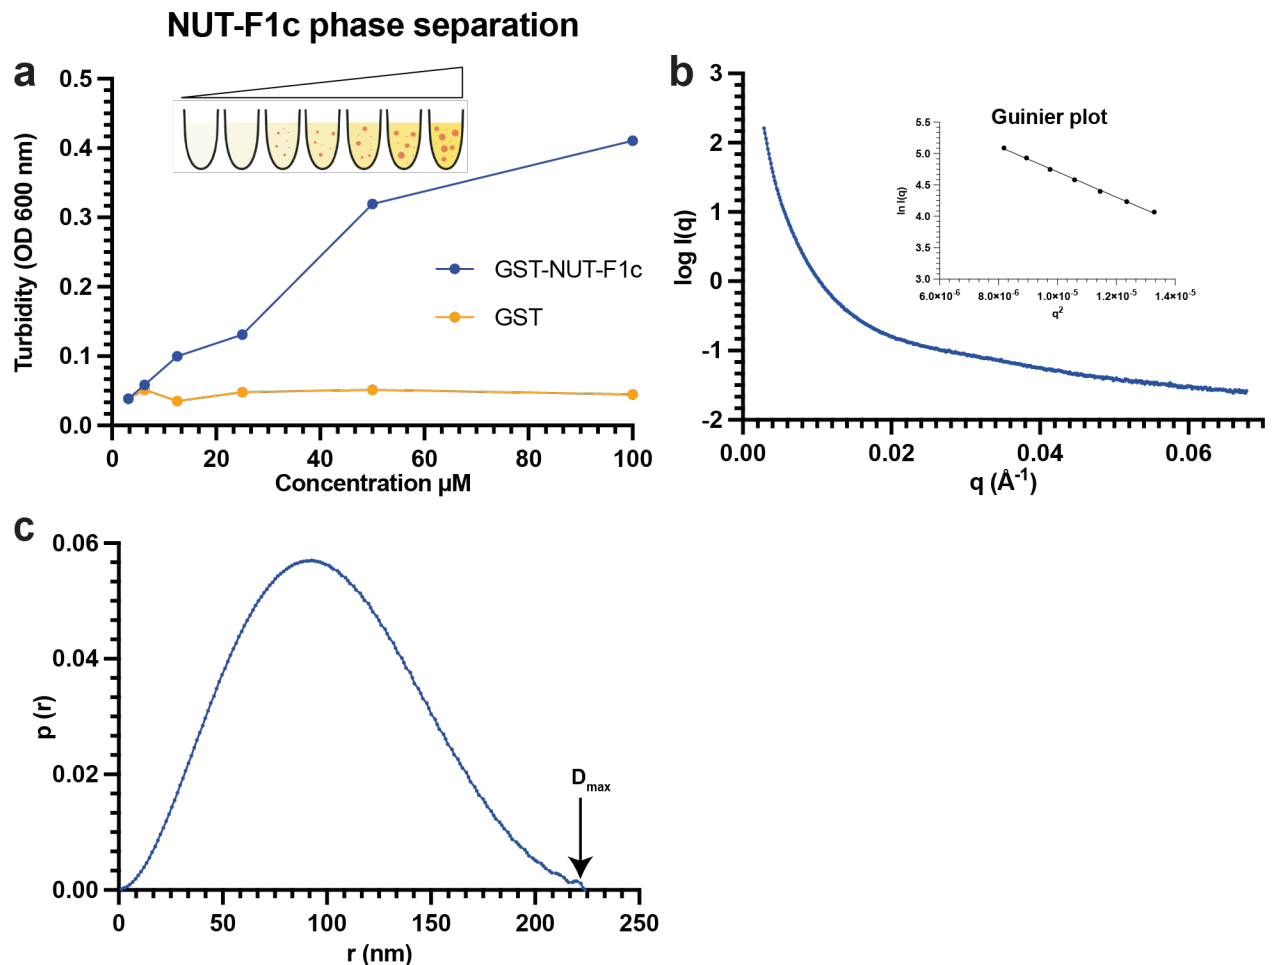

**Supplementary Fig. 7. Condensation is driven by bromodomain multivalency.**

**a**, Concentration-dependent droplet formation of GST-NUT-F1c (blue) in droplet formation buffer with 125 mM NaCl and 10% PEG-8000 measured by turbidity. **b**, Experimental SAXS profile (log intensities calculated as a function of momentum transfer) for a 100mM solution of GST-NUT-F1c in droplet formation buffer (blue). The Guinier region is inset. **c**, Distance distribution function. The experiment was repeated twice with consistency.

**Supplementary Table 1 – List of NUT constructs and binding experiments**

| Sample    | Amino acid residues | Binding* |
|-----------|---------------------|----------|
| NUT F1c   | 347-588             | +        |
| NUT1      | 347-446             | +/-      |
| NUT2      | 427-527             | +        |
| NUT3      | 508-588             | –        |
| NUT4      | 347-480             | +        |
| NUT5      | 347-514             | +        |
| NUT6      | 351-470             | +        |
| NUT7      | 448-492             | +        |
| NUT7 mut1 | 448-492             | +        |
| NUT8      | 396-470             | +        |
| NUT8 mut1 | 396-470             | –        |
| NUT8 mut2 | 396-470             | –        |
| NUT8 mut3 | 396-470             | +        |
| NUT8 mut4 | 396-470             | +        |
| NUT9      | 395-482             | +        |
| NUT10     | 468-482             | +        |

\*GST-pulldown, co-sedimentation or BLI

NUT7 wt: PLALIEELEQEGLTLAQLVQKRLMALEEEEDAEAPPSFSGAQLD  
NUT7 mut1: PLALIEELEQEAGLTTLAQAQVQKRLMAAEEEDAEAPPSFSGAQLD  
NUT8 wt: GQQQEEEGMYPDGGLLSYINELCSQKVFVSKVEAVIHPQFLADLLSPEKQRDPLALIEELEQEGLTLAQLVQKRLMALEEEEDAE  
NUT8 Mut1: GQQQEEEGMYPDGGAASAINEAASQKVAASKAEAAHPQAAADAAASPEKQRAPAGAIAAAAQAAGAAQLVQKRLMALEEEEDAE  
NUT8 Mut2: GQQQEEEGMYPKPGALSKINELGSQKVAGSKVSAGIHGQSLADGSSPEKQRKPLGSLIEKSEQKSGGSLAQLVQKRLMALEEEEDAE  
NUT8 Mut3: GQQQEEEGMYPDGGLLSYINELCSQKVFVSKVEAVIHPQFLADLLSPEKQRAPAGAIAAAAQAAGAAQLVQKRLMALEEEEDAE  
NUT8 Mut4: GQQQEEEGMYPDGGLLSYINELCSQKVFVSKVEAVIHPQFLADAAASPEKQRAPAGAIAAAAQAAGAAQLVQKRLMALEEEEDAE

**Supplementary Table 2 – Chemical shifts shown in figure 2a induced by adding 1 molar equivalent of TAZ2 to <sup>15</sup>N labelled NUT7(448-492)**

| Sequence | <sup>1</sup> H (ppm) | <sup>15</sup> N (ppm) |
|----------|----------------------|-----------------------|
| 449Leu   | 8.06773              | 118.78799             |
| 450Ala   | 7.89105              | 123.06117             |
| 451Leu   | 7.94511              | 120.13024             |
| 455Leu   | 7.84131              | 117.27243             |
| 457Gln   | 7.93157              | 120.03990             |
| 458Glu   | 8.16162              | 120.37610             |
| 459Glu   | 8.46125              | 121.39694             |
| 460Gly   | 8.44341              | 109.65104             |
| 461Leu   | 7.83935              | 121.27930             |
| 462Thr   | 8.33380              | 113.62034             |
| 463Leu   | 8.58382              | 122.64937             |
| 465Gln   | 8.30271              | 121.70734             |
| 466Leu   | 8.44144              | 121.21074             |
| 472Met   | 8.46928              | 119.95793             |
| 473Ala   | 8.30164              | 125.96641             |
| 474Leu   | 8.07340              | 121.83051             |
| 477Glu   | 8.17684              | 120.39170             |
| 478Glu   | 8.19945              | 120.76303             |
| 479Asp   | 8.43618              | 121.91631             |
| 480Ala   | 8.21909              | 124.95127             |
| 481Glu   | 8.33580              | 119.83160             |
| 482Ala   | 8.19007              | 126.64685             |
| 488Gly   | 7.92783              | 110.73711             |

|        |         |           |
|--------|---------|-----------|
| 489Ala | 8.08558 | 123.65890 |
| 490Gln | 8.37611 | 119.90610 |
| 491Leu | 8.31554 | 124.54835 |
| 492Asp | 7.90591 | 126.48987 |

**Supplementary Table 3 - HADDOCK docking statistics**

|                                                       |               |
|-------------------------------------------------------|---------------|
| <b>Distance constraints</b>                           |               |
| Ambiguous interaction restraints (AIRs)               | 14            |
| Active residues on NUT7                               | 5             |
| Active residues on TAZ2                               | 9             |
| Intermolecular NOEs                                   | 2             |
| <b>Dihedral angle restraints*</b>                     |               |
| Phi/Psi                                               | 5/5           |
| <b>Structural statistics</b>                          |               |
| AIR Violations (mean $\pm$ s.d.)                      | $2 \pm 1$     |
| <b>Ramachandran analysis</b>                          |               |
| Residues in the favoured region (%)                   | 87%           |
| Residues in the additional allowed regions (%)        | 10%           |
| Outliers                                              | 3%            |
| <b>Intermolecular energies after water refinement</b> |               |
| $E_{vdw}$ (kcal mol <sup>-1</sup> )                   | $-45 \pm 7$   |
| $E_{elec}$ (kcal mol <sup>-1</sup> )                  | $-303 \pm 32$ |
| Buried surface area (Å <sup>2</sup> )                 | $1498 \pm 88$ |

\*Dihedral angle restraints derived from chemical shift values using TALOS-N are applied to NUT7 only. For the TAZ2 domain, the structure in PDB 2mzd is used as input to HADDOCK.

**Supplementary Table 4 - Cryo-EM data collection and map reconstruction**

| <b>Nucleosome Core Particle</b>                                            |                                   |
|----------------------------------------------------------------------------|-----------------------------------|
| <b>Data collection</b>                                                     | FEI Titan Krios G3                |
| Detector                                                                   | Gatan K3 direct electron detector |
| Voltage                                                                    | 300 kV                            |
| Pixel size (Å)                                                             | 1.086                             |
| Nominal Magnification                                                      | 81,000                            |
| Dose rate on Detector (e <sup>-</sup> sec <sup>-1</sup> px <sup>-1</sup> ) | 15                                |
| Dose rate on specimen (e <sup>-</sup> sec <sup>-1</sup> px <sup>-1</sup> ) | 17                                |
| Defocus range (μm)                                                         | -2.3 to -1.1                      |
| <b>Reconstruction</b>                                                      |                                   |
| Symmetry imposed                                                           | C1                                |
| Initial particle images (no.)                                              | 80,764                            |
| Final particle images (no.)                                                | 33,202                            |
| Resolution, FSC=0.143 (Å)                                                  | 6.61                              |

**Supplementary Table 5 – Quantification of condensation of BRD4-NUT variants\***

| <b>GFP-BRD4-NUT</b>   | <b>RFP-p300 positive</b> | <b>RFP-p300 negative</b> |
|-----------------------|--------------------------|--------------------------|
| <b>WT</b>             | 100/100                  | 100/100                  |
| <b>mut1</b>           | 99/100                   | 89/100                   |
| <b>mut2</b>           | 100/100                  | 92/100                   |
| <b>BD1-BD2</b>        | 16/100                   | 0/100                    |
| <b>BD1</b>            | 18/100                   | 0/100                    |
| <b>BD2</b>            | 99/100                   | 99/100                   |
| <b>K/E</b>            | 21/100                   | 3/100                    |
| <b>ΔNPS</b>           | 100/100                  | 100/100                  |
| <b>ΔBID</b>           | 100/100                  | 9/100                    |
| <b>BD1-BD2-AD</b>     | 99/100                   | 1/100                    |
| <b>BD1-BD2-ADmut1</b> | 0/100                    | 0/100                    |
| <b>BD1-BD2-E1A</b>    | 94/100                   | 91/100                   |

\* Foci forming cells/Total cell count

**Supplementary Table 6 – Quantification of co-localization of BRD4-NUT and p300\***

| GFP-BRD4-NUT | Pearson's R value | Co-localization ratio |
|--------------|-------------------|-----------------------|
| WT           | 0.81±0.01         | 0.90±0.02             |
| ADmut1       | 0.84±0.01         | 0.87±0.02             |
| ADmut2       | 0.76±0.02         | 0.90±0.01             |
| ΔNPS         | 0.76±0.02         | 0.86±0.03             |

\* At least 10 cells were analysed (n=10)

**Supplementary Table 7 – Impact of Drug treatment on condensation**

| GFP-BRD4-NUT | JQ1 | A485 | TSA | CBP30 | 1,6-Hexandiol |
|--------------|-----|------|-----|-------|---------------|
| WT           | No  | No   | No  | Yes   | No            |
| ADmut1       | No  | No   | No  | No    | No            |
| ADmut2       | No  | No   | No  | No    | No            |
| ΔNPS         | No  | No   | No  | Yes   | No            |

**Supplementary Table 8 – Quantification of foci formation of after CBP30 treatment\***

| GFP-BRD4-NUT | DMSO    | CBP30  |
|--------------|---------|--------|
| WT           | 100/100 | 54/100 |
| ADmut1       | 92/100  | 3/100  |
| ADmut2       | 91/100  | 2/100  |
| ΔNPS         | 100/100 | 58/100 |

\*Foci-forming cells/Total cell counted

**Supplementary Table 9 – SAXS data analysis**

| Sample                            | GST-NUT-F1c          |
|-----------------------------------|----------------------|
| <b>Guinier Analysis</b>           | Sample (GST-NUT-F1c) |
| $I(0)$ (cm <sup>-1</sup> )        | 0.8159E+03           |
| $R_g$ (Å)                         | 771.84               |
| $q$ -range (Å <sup>-1</sup> )     | 0.00286 to 0.00365   |
| <b><math>P(r)</math> analysis</b> | Sample (GST-NUT-F1c) |
| $I(0)$ (cm <sup>-1</sup> )        | 0.8159E+03           |
| $R_g$ (Å)                         | 773.00               |
| $d_{max}$ (Å)                     | 2283                 |
| $q$ -range (Å <sup>-1</sup> )     | 0.0029 to 0.0678     |
