# Supplementary material for: Structural insights into p300 regulation and acetylation-dependent genome organisation
Source: Springer Nature journal article supplement (doi:10.1038/s41467-022-35375-2), 2022-12-15
Supplement: MOESM3 [file 41467_2022_35375_MOESM3_ESM.pdf]

### **Descriptions of Additional Supplementary Files**

Supplementary Movie 1: Dynamics of condensation of BD1-BD2-AD and p300. Time laps imaging. Left panel: GFPBD1-BD2-AD. Middle: RFP-p300. Right: Merge of GFP- BD1-BD2-AD and RFP-p300.

Supplementary Movie 2: Dynamics of condensation of BRD4-NUT and p300. Time laps imaging. Left panel: GFPBRD4-NUT. Middle: RFP-p300. Right: Merge of GFP-BRD4-NUT and RFPp300.

Supplementary Data 1: Cross-linking mass spectrometry data showing interactions between p300 and nucleosome core particles.

Supplementary Data 2: Mass spectrometry data showing nucleosome acetylation by p300.
