# Supplementary material for: Structural insights into p300 regulation and acetylation-dependent genome organisation
Source: Nat Commun. 2022 Dec 15;13:7759. doi: 10.1038/s41467-022-35375-2 (PMC9755262; doi:10.1038/s41467-022-35375-2)
Supplement: Supplementary file 9 — Source data [file 41467_2022_35375_MOESM9_ESM.xlsx]

## Sheet: Figure3b
	Response [nm]
TAZ2 [mM]	wild type			mut1			mut2			mut3			mut4
10	0.2453	0.211	0.2134	0.1923	0.152	0.047	0.2101	0.2204	0.1702	0.0804	0.1265	0.0524	0.041	0.0279	0.0245
5	0.2249	0.1895	0.2097	0.1501	0.1228	0.0534	0.1502	0.153	0.1082	0.0197	0.0123	0.005	0.0117	0.0045	0.022
2.5	0.1931	0.1938	0.1622	0.1083	0.0705	0.0329	0.0778	0.0821	0.061	0.0005	0	0.0079	0	0	0.0186
1.25	0.1808	0.1361	0.1358	0.1173	0.0696	0.0273	0.0795	0.0596	0.0543	0	0.0044	0.0166	0	0.0121	0.0158
0.625	0.1164	0.1142	0.1043	0.112	0.0608	0.0229	0.0244	0.0506	0.0131	0	0	0	0.0125	0	0.0042
0.3125	0.1162	0.1062	0.094	0.0931	0.074	0.0292	0.0543	0.052	0.0382	0.0048	0	0	0.0054	0	0.0023
0.1565	0.0846	0.0694	0.0705	0.0596	0.0486	0.0029	0.0411	0.0392	0.0249	0	0	0	0.0076	0	0

## Sheet: Figure 4c
Figure 4c

## Sheet: Figure 4d
Figure 4d

## Sheet: Figure 4e
Figure 4e

## Sheet: Figure 4f
Figure 4f

## Sheet: Figure 5b
Figure 5b

## Sheet: Figure 6d
	GFP-BRD4-NUT
	WT	mut1	mut2	DBID	BD1	BD2	BD1-BD2-AD	DNPS
Characteristic time of recovery (sec)	22.9391	22.1592	15.3146	8.28368	11.1567	14.6849	11.4092	19.0224
	19.4306	12.5068	12.6449	5.72189	11.4816	20.3461	10.9411	17.9669
	17.6395	10.1635	11.8706	3.02126	10.8236	9.52889	15.6315	14.5984
					8.01506	12.3888	9.73347	18.6546
	RFP-p300
	WT	mut1	mut2	DBID	BD1	BD2	BD1-BD2-AD	DNPS
Characteristic time of recovery (sec)	22.0023	17.2018	17.2936	6.72977	21.2855	19.0153	33.3107	17.2908
	18.05	11.1755	10.57	11.2042	20.7619	34.9206	28.5823	24.5117
	17.8445	17.8264	14.3793	15.3488	23.8222	31.0361	25.0045	25.035
					18.9279	18.5734	29.0691	22.176

## Sheet: Figure 6f
	Fluorescence Intensity
Time (sec)	Unbleached	Center	Periphery
0	236.5	242.6	225.4
0.783	245.75	248.8	209.4
1.566	255	237.7	214.5
2.349	254.833	227.6	228.6
3.132	249.917	233.6	183.3
3.915	209.083	118.4	72.5
4.698	189.833	27.7	41.1
5.481	200.25	55.9	77.8
6.264	206.75	81.6	84.6
7.047	221.167	116	98.3
7.83	207.25	175	80.7
8.613	194.167	197.9	80
9.396	183.833	176.2	116.7
10.179	195.583	180.4	127.1
10.962	216.333	175.3	137.2
11.745	229.167	168.4	130
12.528	238.5	205.4	105.2
13.311	228.083	246.1	109.6
14.094	236.333	212.6	122.6
14.877	244.917	198.3	141.8
15.66	248.5	236.6	129.8
16.443	255	244.8	144.6
17.226	249.667	247.1	155.4
18.009	249.667	242.4	153.5
18.792	235.833	238.9	184.3
19.575	221.167	250.9	177.1
20.358	240.333	254.4	151.2
21.141	255	253.9	155.3
21.924	243	253.9	144
22.707	241.083	248.8	139.9
23.49	253.083	240.9	140
24.273	255	193.7	126.1
25.056	255	166	134
25.839	255	217.1	139.9
26.622	253.083	246.3	190.8
27.405	244.417	244.7	196.2
28.188	216.333	248.8	156.6
28.971	222.333	231.8	167.6
29.754	252.333	234.1	173
30.537	254.667	248.6	159.2
31.32	247.75	241.5	157.8
32.103	240.583	235.4	148.9
32.886	247.5	242.5	129.8
33.669	251.583	209.2	151.7
34.452	246.333	205.4	153.8
35.235	249.75	236.3	124.8
36.018	237.333	239.4	134.1
36.801	234.333	223.4	144.3
37.584	252	224.1	123.1
38.367	255	234.8	125.1
39.15	245.417	225.1	153.7
39.933	245.417	231.1	172.3
40.716	255	221.8	180.2
41.499	255	218.7	172.3
42.282	252.083	197.1	141
43.065	246.75	213.7	116.9
43.848	236.583	249.1	159.5
44.631	241.917	249.8	155.9
45.414	250.333	254.3	137.4
46.197	243.167	252.9	177
46.98	246.667	250.2	189.9
47.763	253.833	239.1	173.4
48.546	249.167	226.7	168.9
49.329	248	233.8	154.7
50.112	248.583	232.1	142.9
50.895	249.75	231.9	158.8
51.678	246.5	247.6	139.8
52.461	246.5	226.6	119.6
53.244	250.167	223.8	142.1
54.027	248.333	222	154.1
54.81	244.833	226.6	128
55.593	229.167	255	153.4
56.376	235.583	255	156.5
57.159	248.417	247.1	122.4
57.942	250.333	247.1	124.7
58.725	246.75	247.7	124.4
59.508	244.083	244.8	124.2
60.291	250.417	225.8	115.3
61.074	253.083	228.7	134.7
61.857	251.333	234.8	123.9

## Sheet: Supplementary Fig. 1c
	vector
	Empty	Gal4 DBD 100 ng	Gal4 Nut 50 ng	Gal4 Nut 100 ng	Gal4 Nut 200 ng	Nut 100 ng
Luciferease fold activation	1.11463	0.86764	3.67981	4.547	5.02161	1.17237
	0.902531	1.16636	3.51144	4.45809	5.85631	0.641161
	0.982834	0.971689	2.88941	4.54192	6.32134	0.794407

## Sheet: Supplementary Fig. 7a
Concentration [µM]	GST-NUT-F1c	GST
	Turbidity (OD 600nm)
3.125	8.91204	57.1856
6.25	17.8241	114.371
12.5	35.6481	228.742
25	71.2963	457.485
50	142.593	914.969
100	285.185	1829.94

[truncated: 2 more sheets: Supplementary Fig. 7b, Supplementary Fig. 7c]
